# Supplementary material
Source: PubMed Central journal article supplement (PMC8761198)
Supplement: 12195_2021_710_MOESM1_ESM.pdf [file 12195_2021_710_MOESM1_ESM.pdf]

## **Supplementary Information**

### **Evaluating the Role of IL-1 $\beta$ in Transmigration of Triple Negative Breast Cancer Cells**

#### **Across the Brain Endothelium**

Pedram Motallebnejad, Vinayak V. Rajesh, Samira M. Azarin

#### **Supplementary Materials:**

Supplementary Tables S1-S3

Supplementary Figures S1-S3

**Table S1. List of the primers used for qRT-PCR assays**

| <b>Gene Name</b> | <b>Unique ID or Forward and Reverse Sequence</b>                               | <b>Vendor</b> |
|------------------|--------------------------------------------------------------------------------|---------------|
| <i>VWF</i>       | qHsaCED0043330                                                                 | BioRad        |
| <i>OCN</i>       | qHsaCED0038290                                                                 | BioRad        |
| <i>TJP1</i>      | qHsaCID0018062                                                                 | BioRad        |
| <i>CLDN5</i>     | qHsaCED0047644                                                                 | BioRad        |
| <i>MMP2</i>      | qHsaCED0042560                                                                 | BioRad        |
| <i>MMP9</i>      | qHsaCID0011597                                                                 | BioRad        |
| <i>PECAM1</i>    | Fwd sequence:<br>TGCCGTGGAAAGCAGATACT<br>Rev sequence:<br>TTCCAGGGATGTGCATCTGG | BioRad        |
| <i>GAPDH</i>     | qHsaCED0038674                                                                 | BioRad        |
| <i>ACTA2</i>     | qHsaCID0013300                                                                 | BioRad        |
| <i>TAGLN</i>     | qHsaCID0021424                                                                 | BioRad        |

**Table S2. List of the primary antibodies used for immunocytochemistry**

| <b>Primary Antibody (Vendor, Clone or Product Number)</b> | <b>Dilution Factor</b> |
|-----------------------------------------------------------|------------------------|
| Mouse monoclonal Claudin-5 (Invitrogen, 4C3C2)            | 1:100                  |
| Rabbit polyclonal PECAM-1 (Lab Vision, RB10333P)          | 1:50                   |
| Rabbit polyclonal ZO-1 (Invitrogen, 40-2200)              | 1:100                  |
| Rabbit polyclonal SM-22 $\alpha$ (Invitrogen PA527463)    | 1:200                  |
| Rabbit monoclonal GFAP (Abcam, EPR1034Y)                  | 1:400                  |
| Goat polyclonal IL1RII (R&D systems, AF-263)              | N/A                    |
| Goat polyclonal IL1RI (R&D systems, AF-269)               | N/A                    |
| Mouse Monoclonal DARC (R&D systems, 358307)               | 1:200                  |
| Mouse Monoclonal IL-1 $\beta$ (R&D systems, 2805)         | 1:200                  |

**Table S3. List of the secondary antibodies used for immunocytochemistry**

| <b>Secondary Antibody Conjugate (Vendor)</b>    | <b>Dilution Factor</b> |
|-------------------------------------------------|------------------------|
| Goat anti mouse Alexa Fluor 488 (ThermoFisher)  | 1:200                  |
| Goat anti mouse Alexa Fluor 594 (ThermoFisher)  | 1:200                  |
| Goat anti rabbit Alexa Fluor 488 (ThermoFisher) | 1:200                  |
| Goat anti rabbit Alexa Fluor 594 (ThermoFisher) | 1:200                  |

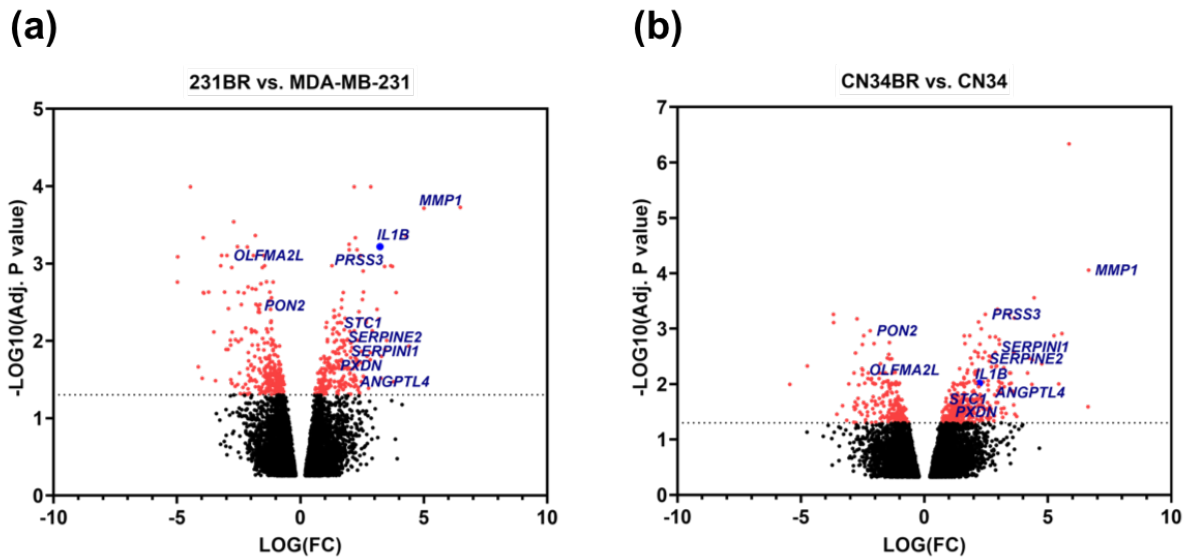

**Figure S1. Expression of IL-1 $\beta$  is highly upregulated in brain-seeking triple negative breast cancer cells.** Analysis was performed on the GSE12237 dataset. (a-b) Volcano plot analysis of differential gene expression in brain-seeking vs. parental MDA-MB-231 (a) and CN34 (b) cells. The dashed line shows adjusted P value of 0.05. *IL1B* data point is denoted by blue color. Other secreted proteins are indicated by their gene names on the plots.

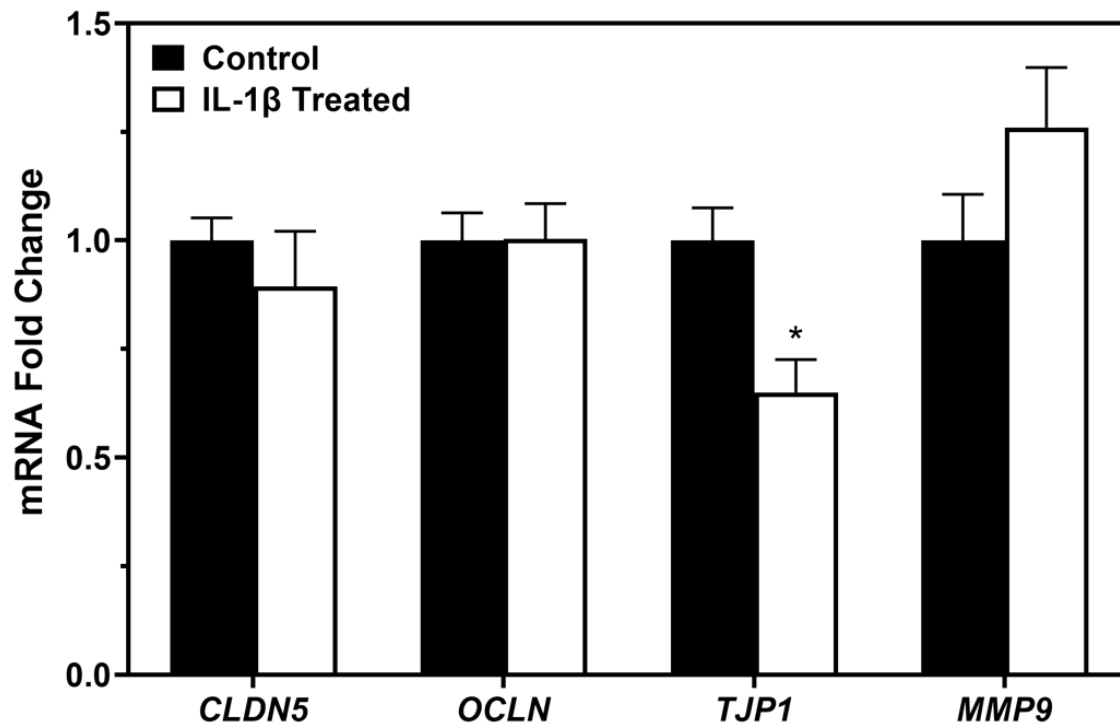

**Figure S2. Expression of *MMP9* and *CLDN5* returns to normal 24 hours after IL-1 $\beta$  treatment.** Gene expression analysis of iBMEC monoculture 24 hours after IL-1 $\beta$  was added to the culture. In IL-1 $\beta$  treated samples, *TJP1* is downregulated, whereas expression of *CLDN5*, *OCLN*, and *MMP9* is not altered. \* indicates P<0.05 calculated by unpaired t-test.

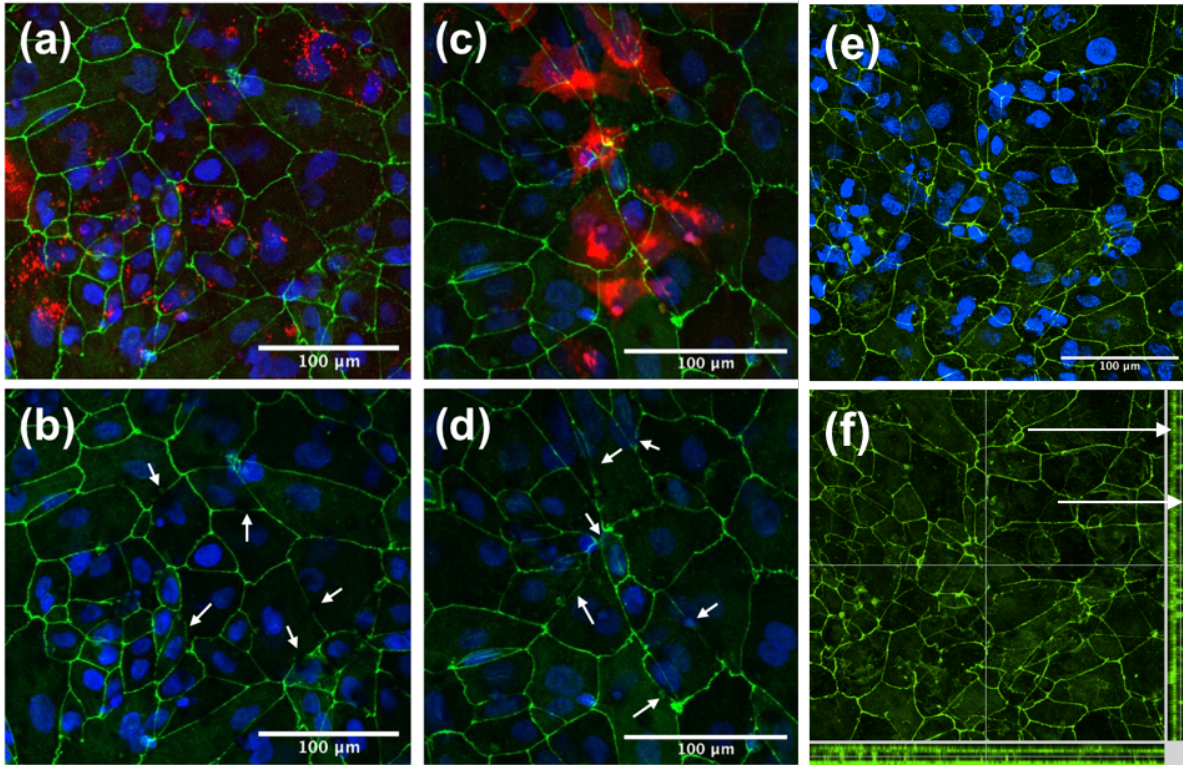

**Figure S3. MDA-MB-231 and 231BR cells transmigrate across iBMECs in cell culture inserts.** (a-d) Confocal images of cancer cells (red) and claudin-5 expression on iBMECs (green) showing transmigrated MDA-MB-231 (a) and 231BR (c) cells in red. (b) and (d) show the iBMEC monolayer above the transmigrated cancer cells in (a) and (c), respectively. There are some regions with tight junction discontinuity in (b) and (d), which are indicated by white arrows, possibly due to interactions with the cancer cells. (e) Confocal image of claudin-5 expression (green) in a region with a double layer iBMECs. (f) X- and y-axis projection of claudin-5 expression in the image in (e), showing the formation of a double layer of iBMECs on each side of the membrane, indicated by white arrows. Scale bars indicate 100  $\mu\text{m}$  and images are maximum intensity projections of confocal z-stacks. Blue indicates cell nuclei.
